# Supplementary material for: Hepatocyte-specific Smad7 deletion accelerates DEN-induced HCC via activation of STAT3 signaling in mice
Source: PubMed Central journal article supplement (PMC5294248; doi:10.1038/oncsis.2016.85), 2017-01-30

# Supplementary figure 1

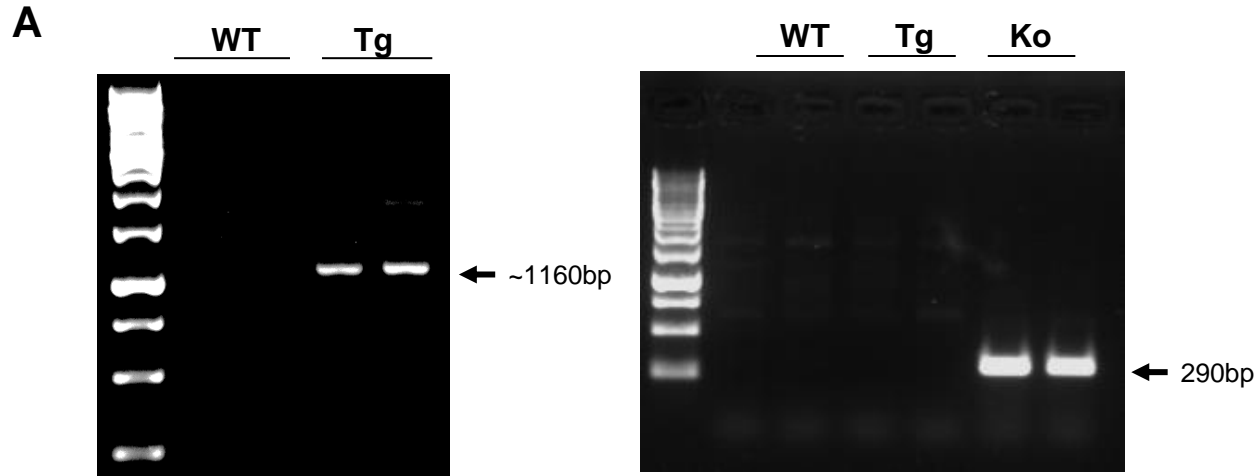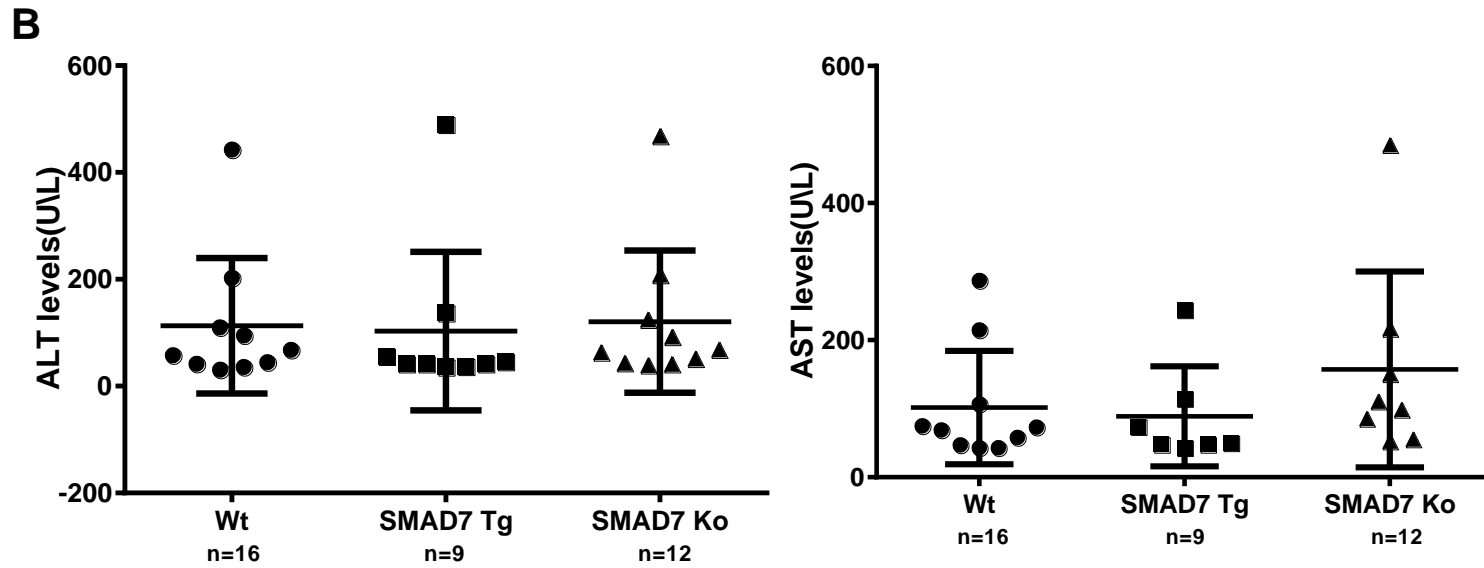

# Supplementary figure 2

**A**

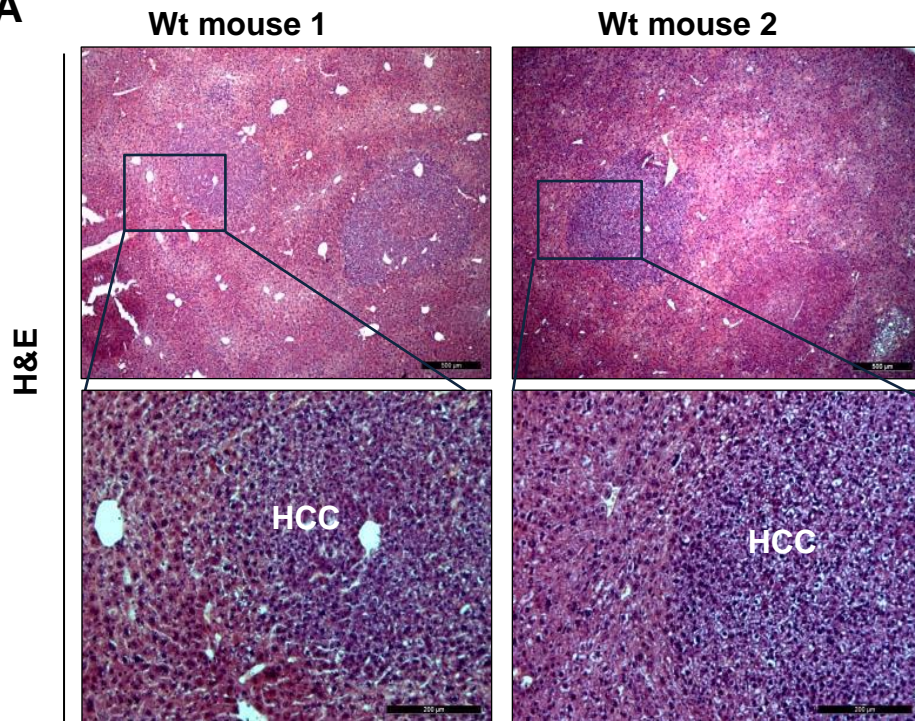

**B**

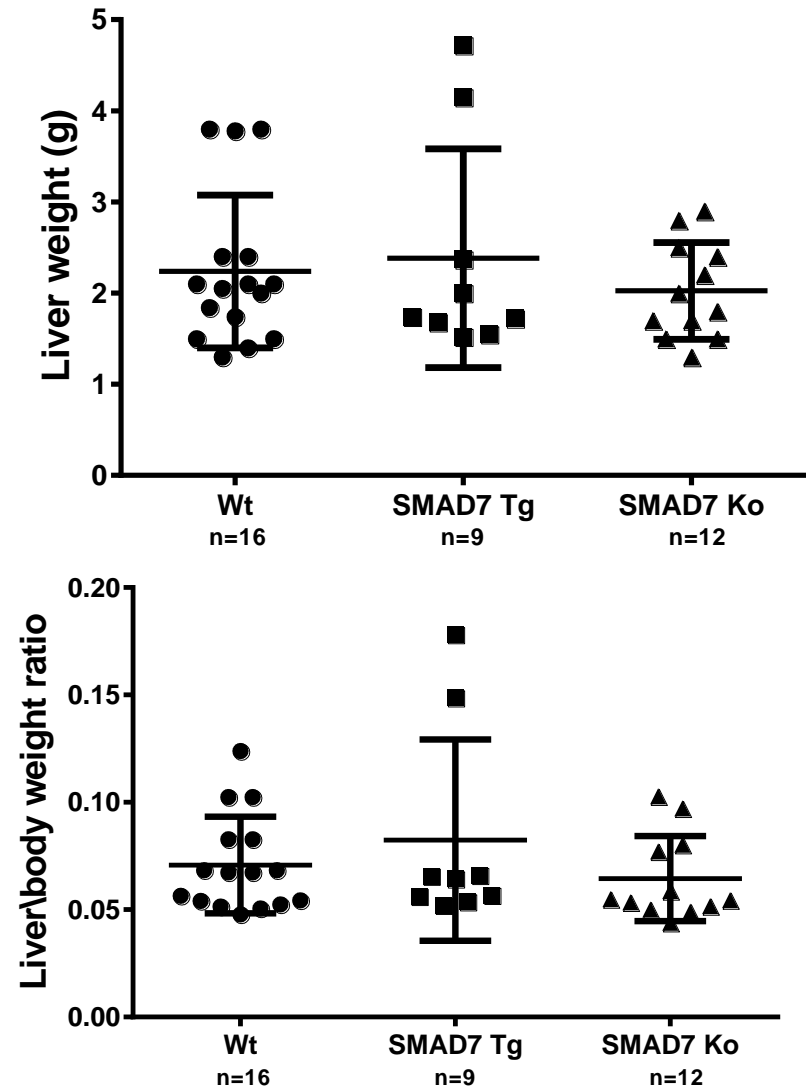

# Supplementary figure 3

**A**

Transgenic mice:

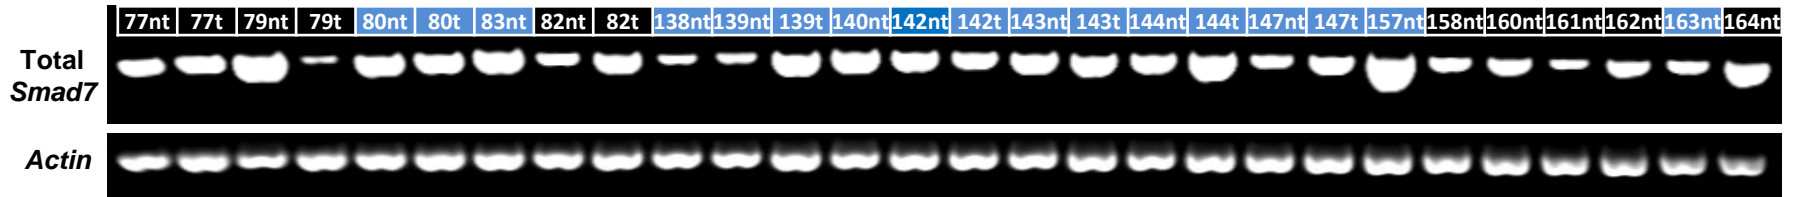

**B**

Knockout mice:

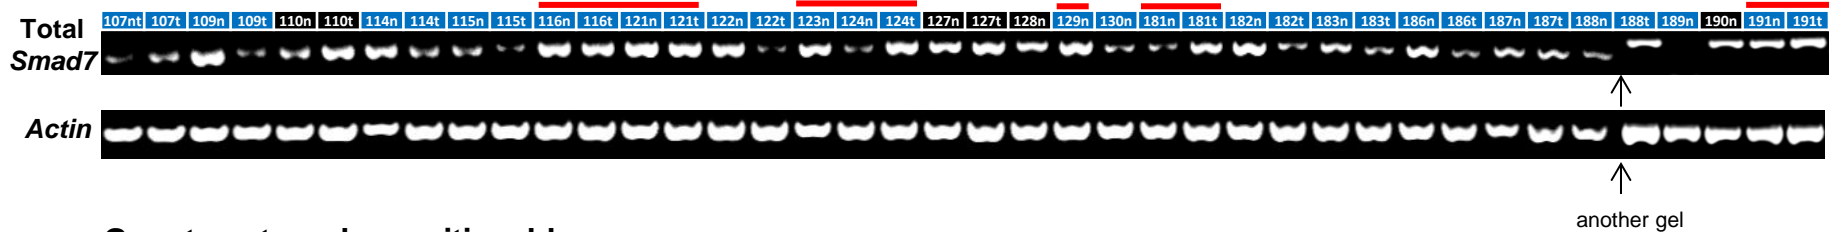

Genotype tg or ko positive: blue

Wildtype: black

Red labelled mice were excluded from the analysis of AST, ALT, tumor number, tumor size, liver weight and liver/body weight ratios based on non or adverse regulated Smad7 expression levels and/or because they did not show any tumor development for further analysis  
All mice were included in the analysis shown in figure 3.

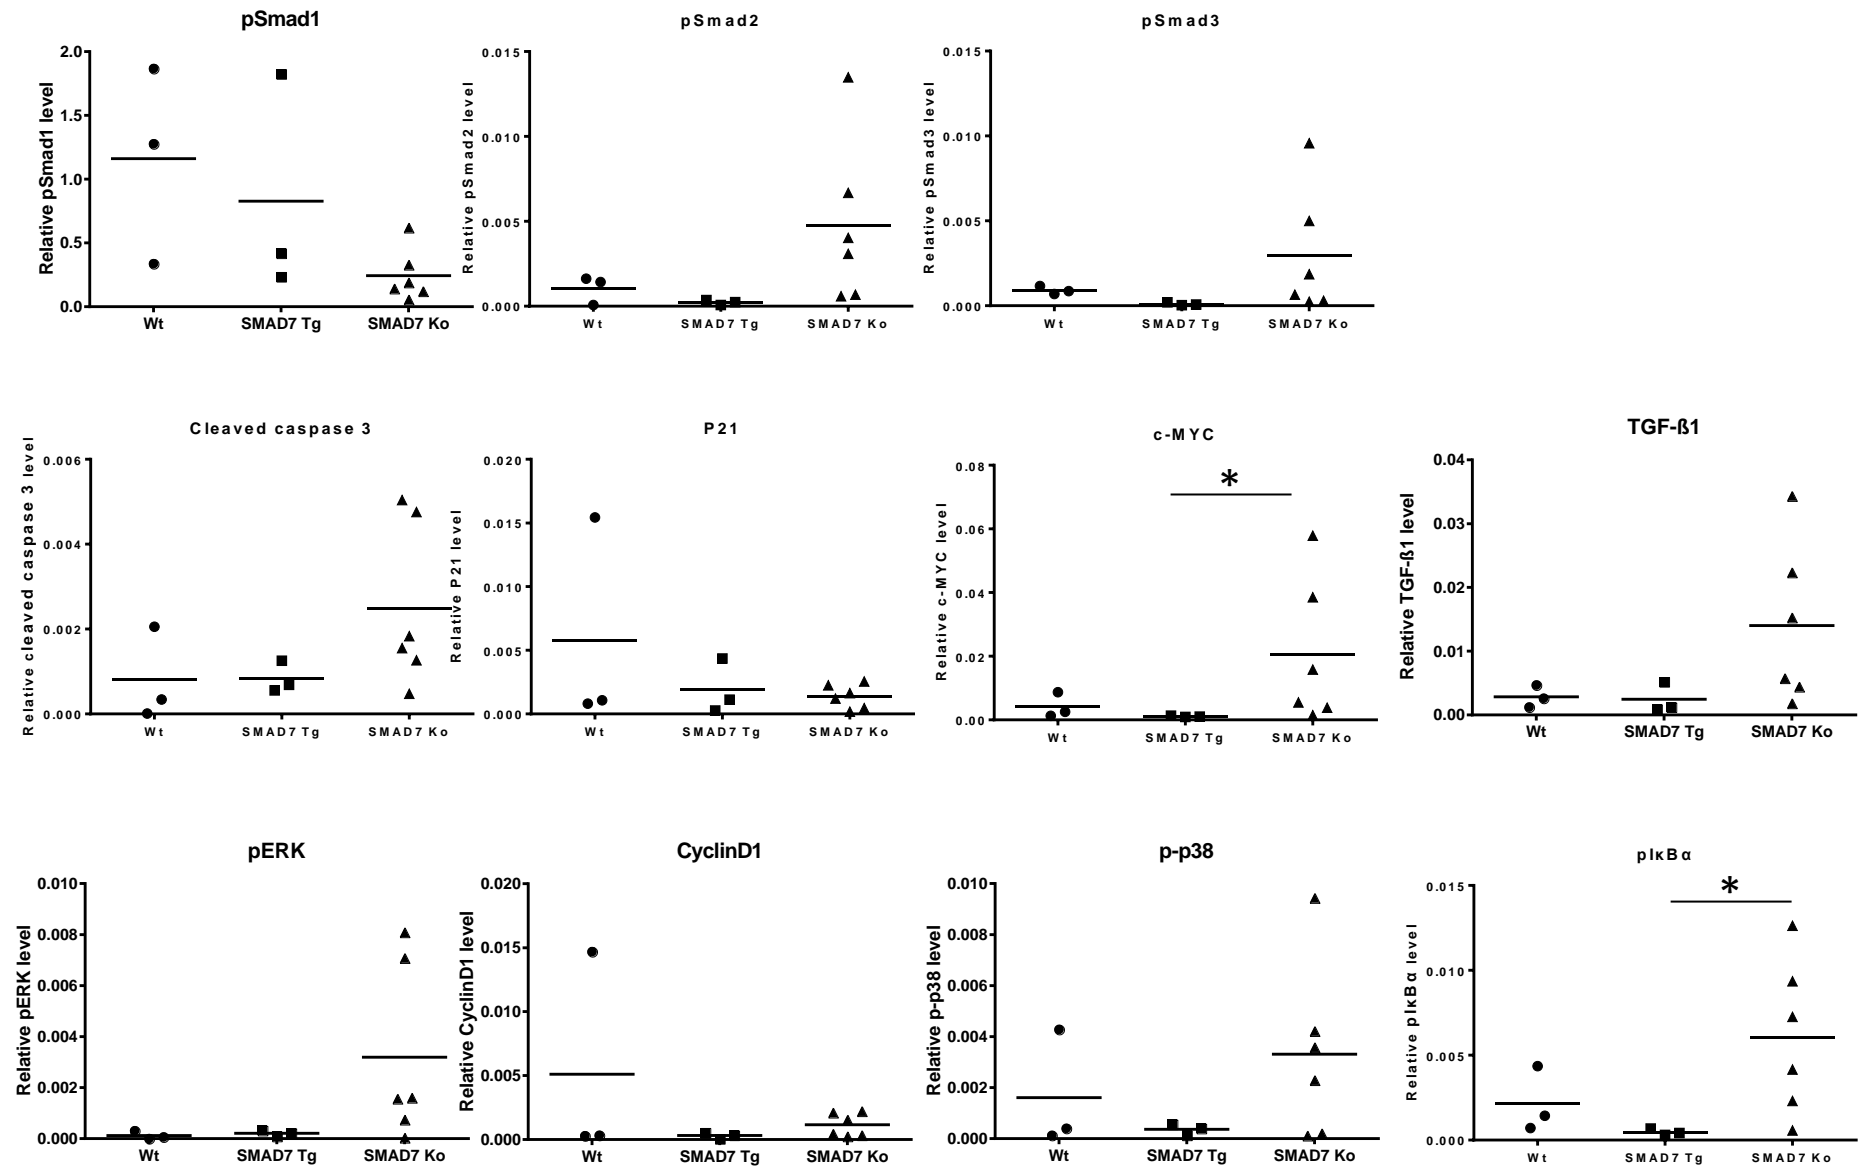

# Supplementary figure 4 A

# Normalized to actin and Smad7

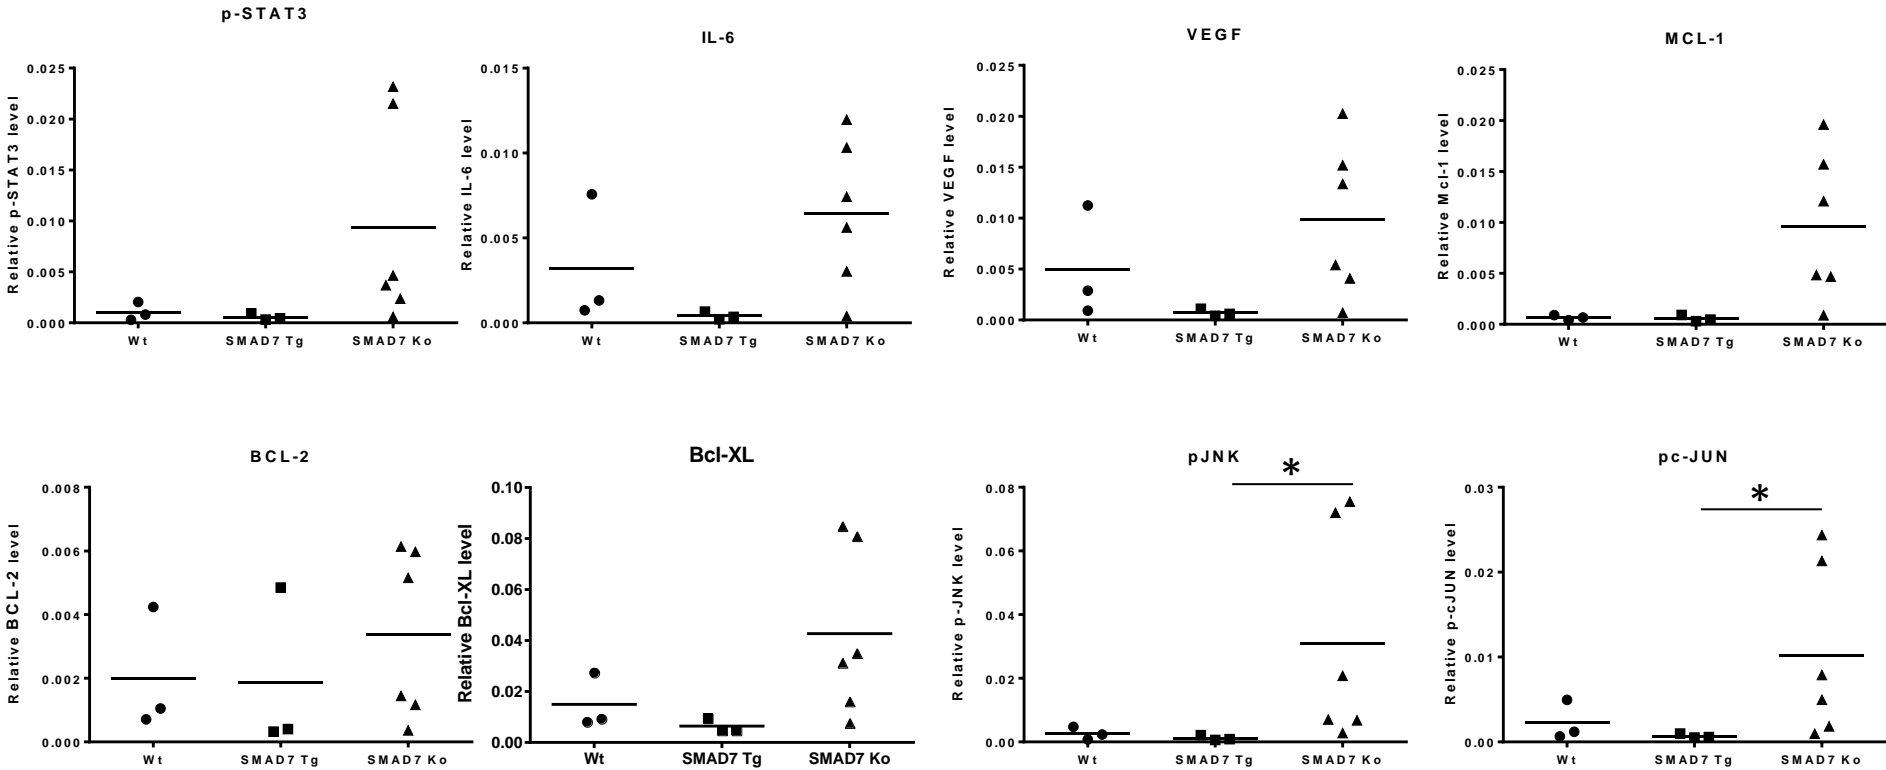

# Supplementary figure 4 B

# Normalized to actin

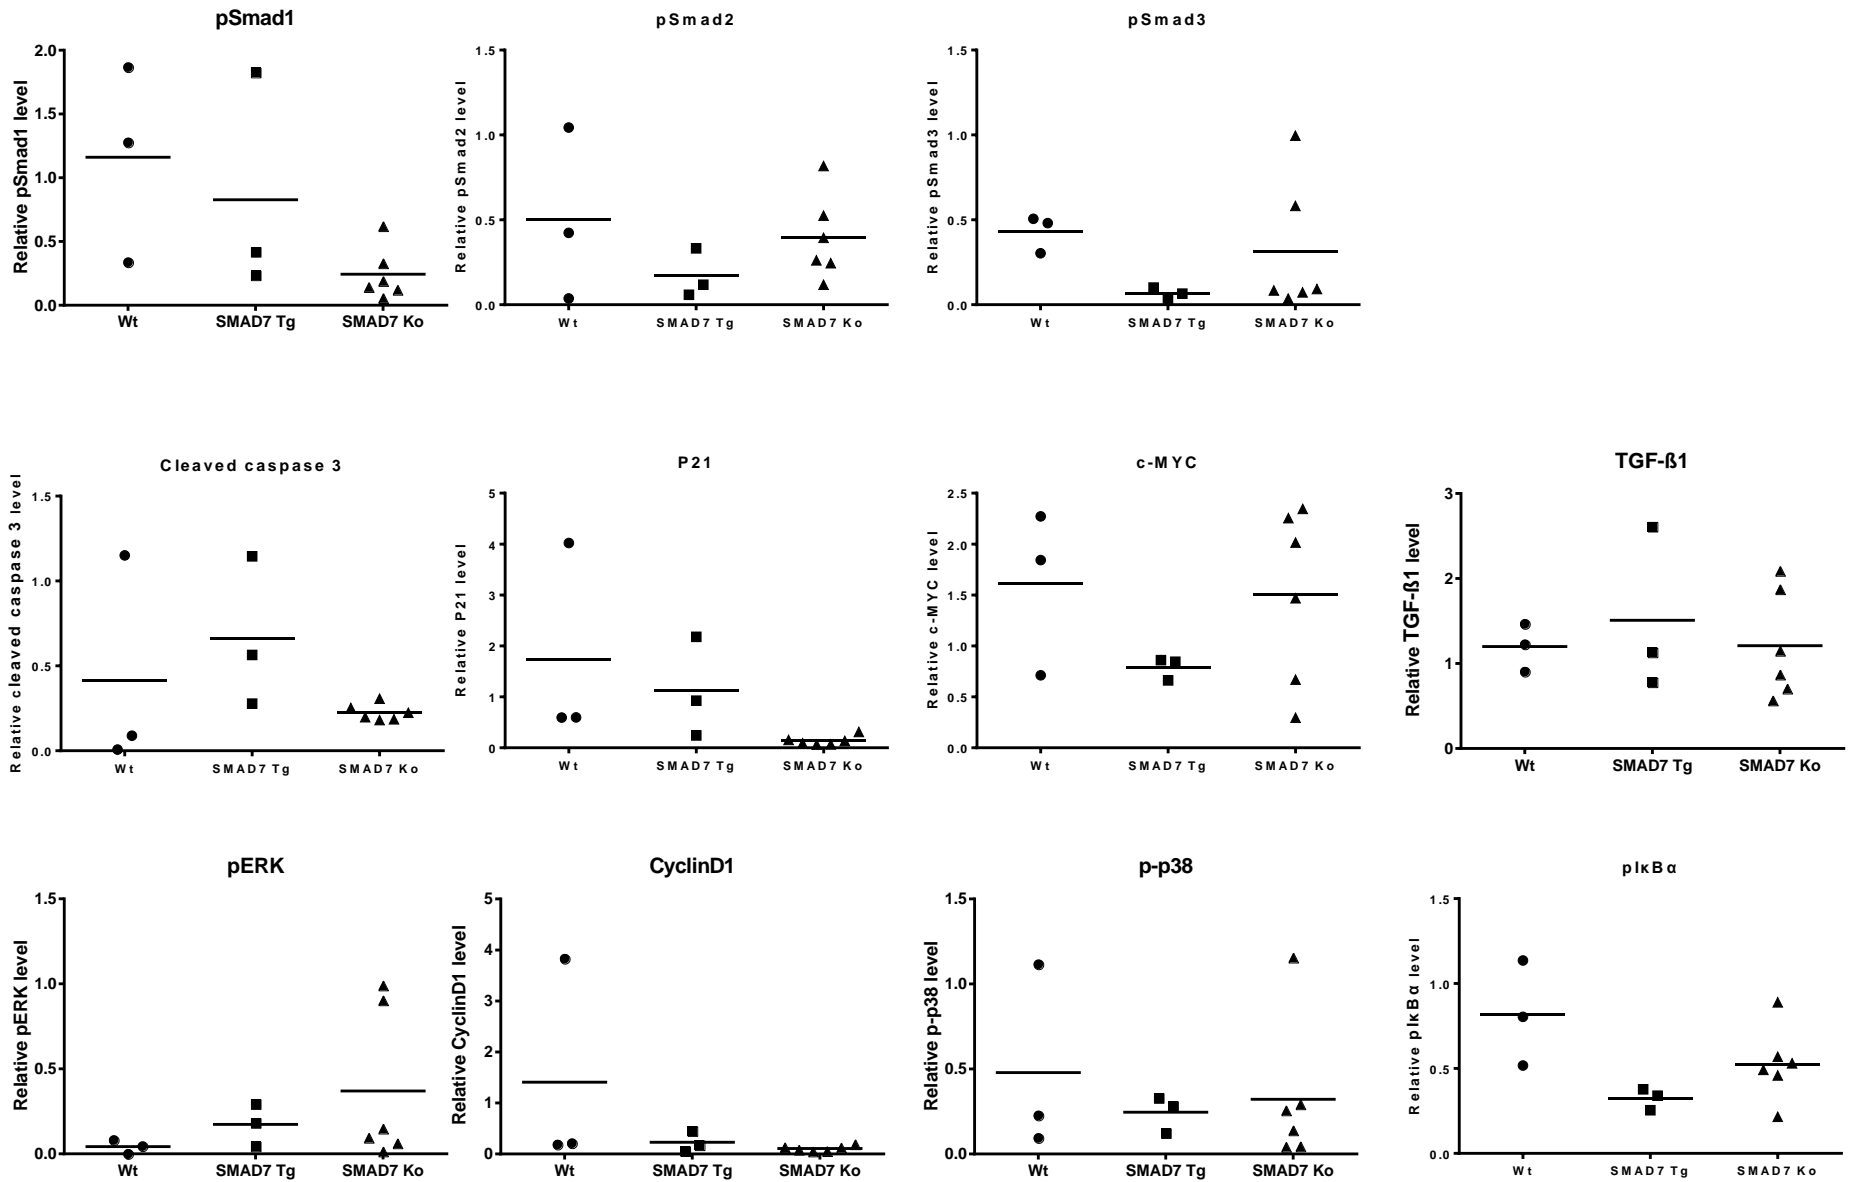

# Supplementary figure 4 B

# Normalized to actin

**p-STAT3**

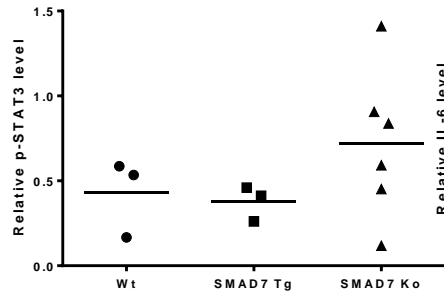

**IL-6**

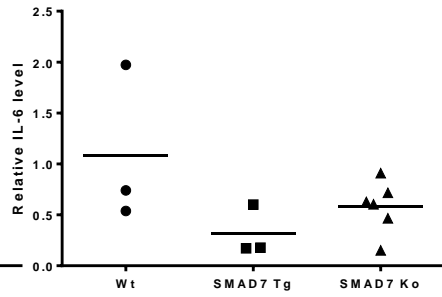

**VEGF**

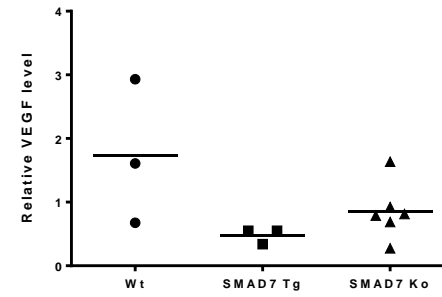

**MCL-1**

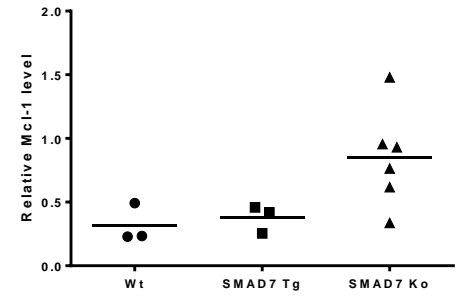

**BCL-2**

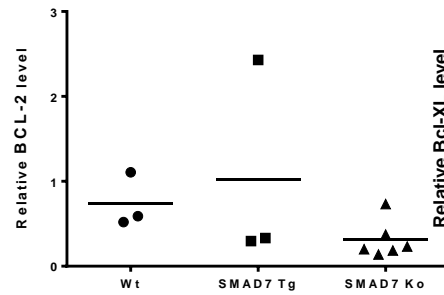

**Bcl-XL**

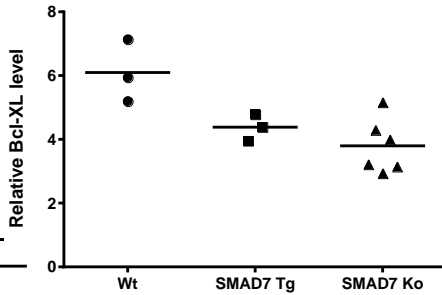

**pJNK**

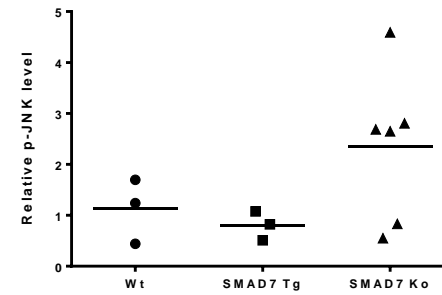

**pc-JUN**

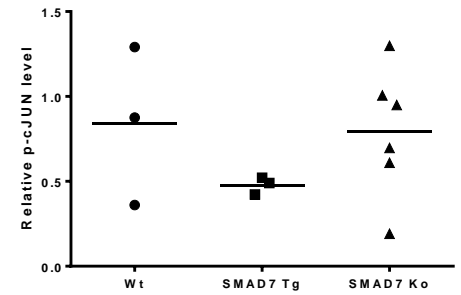

# Supplementary figure 5

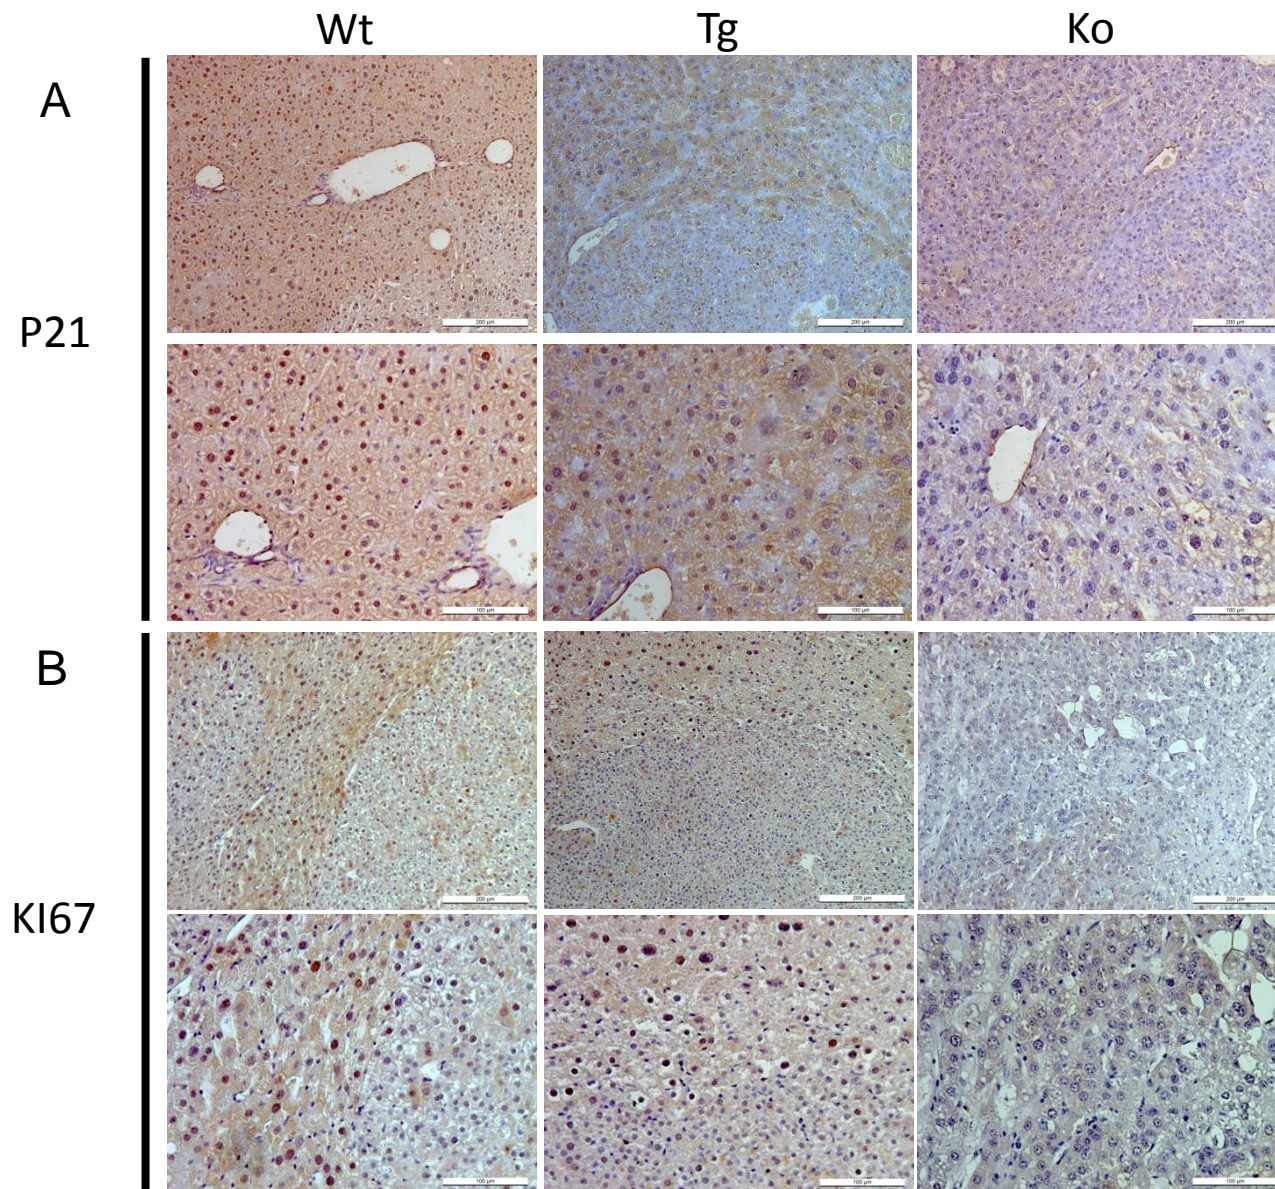



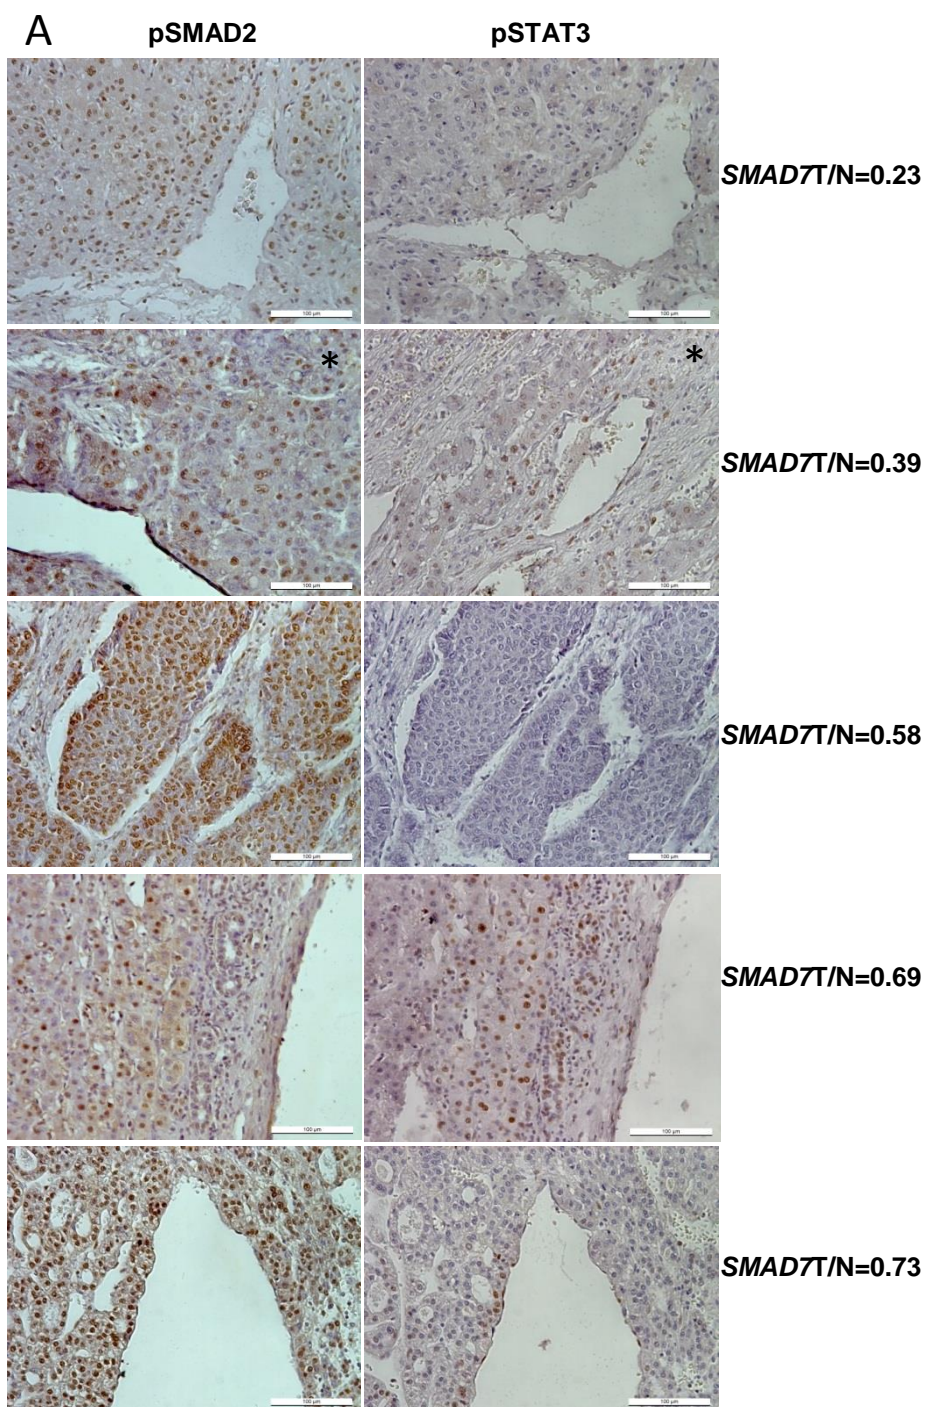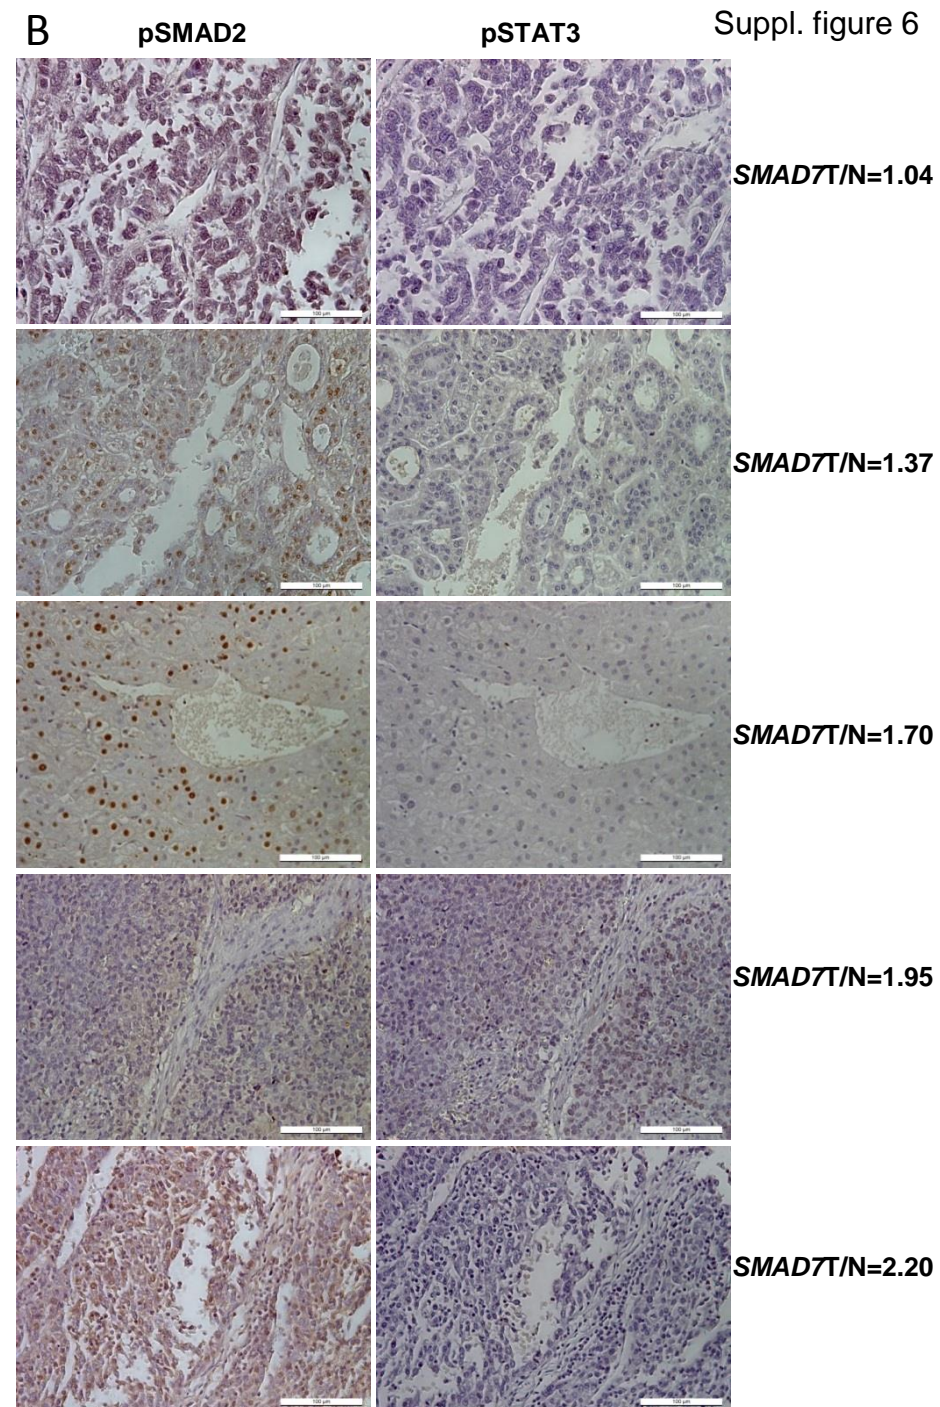

# Supplementary figure 7

A

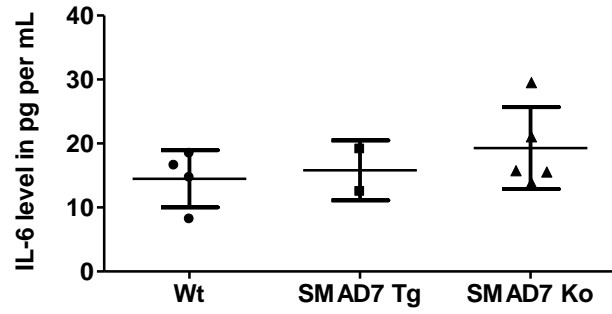

B

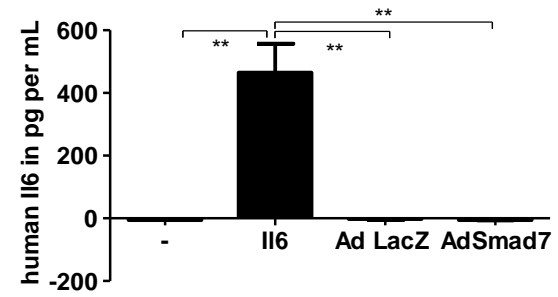

# Supplementary figure 8

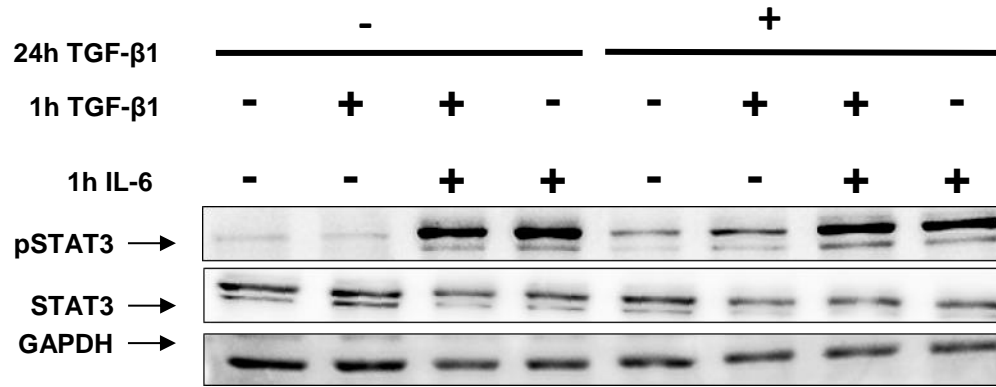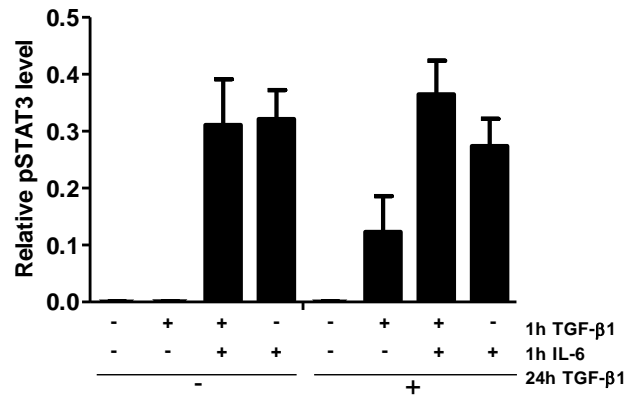

Supplement: oncsis201685x2.pdf [file oncsis201685x2.pdf]
